# Supplementary material
Source: PubMed Central journal article supplement (PMC3569991)
Supplement: cdd2012147x1.pdf [file cdd2012147x1.pdf]

## **SUPPLEMENTARY INFORMATION**

This file (in PDF format) contains Supplementary Figure S1 - S6, Supplementary Table S1 and S2, and Legends for Supplementary Table S3 and S4. Supplementary Table S3 and S4 are listed as separate Microsoft Excel spreadsheet documents.

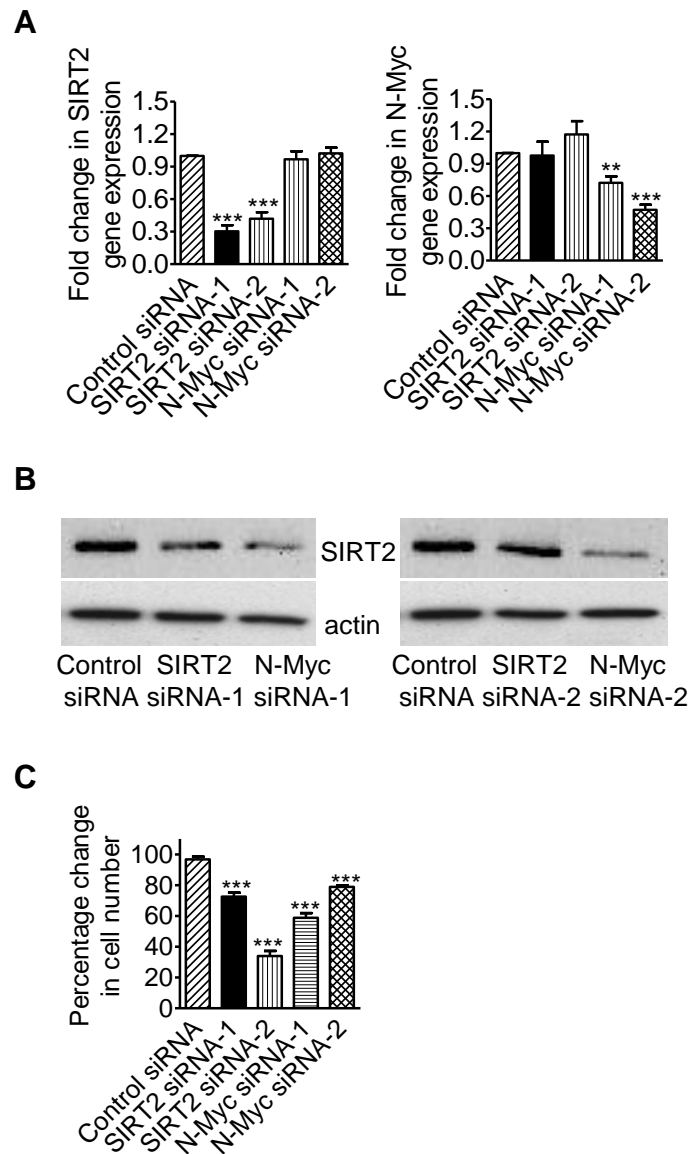

**Figure S1. Up-regulation of SIRT2 expression promotes neuroblastoma cell proliferation.** (A, B) CHP134 cells were transfected with scrambled control siRNA, N-Myc siRNA-1, N-Myc siRNA-2, SIRT2 siRNA-1 or SIRT2 siRNA-2 for 48 hours, followed by RNA and protein extraction, real-time RT-PCR (A) and/or immunoblot (B) analyses of N-Myc and SIRT2 mRNA and/or protein expression. (C) CHP134 cells were transfected with scrambled control siRNA, N-Myc siRNA-1, N-Myc siRNA-2, SIRT2 siRNA-1 or SIRT2 siRNA-2. Seventy-two hours later, relative cell numbers were examined by the Alamar blue assay, and expressed as percentage change in cell numbers. Error bars represented standard error. \*\* indicated  $P < 0.01$  and \*\*\*  $P < 0.001$ .

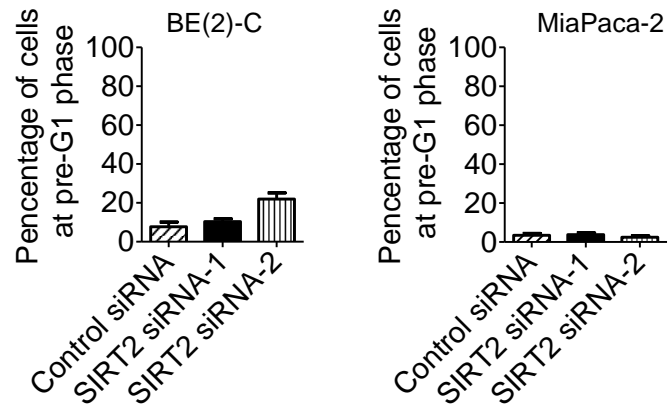

**Figure S2. Repression of SIRT2 does not induce apoptosis.** BE(2)-C and MiaPaca-2 cells were transfected with scrambled control siRNA, SIRT2 siRNA-1 or SIRT2 siRNA-2. Seventy-two hours after siRNA transfection, cells were stained with propidium iodide reagents, and subjected to flow cytometry analyses of cell cycle. The percentages of dead cells at pre-G1 phase were calculated with CellQuest cell cycle analysis program.

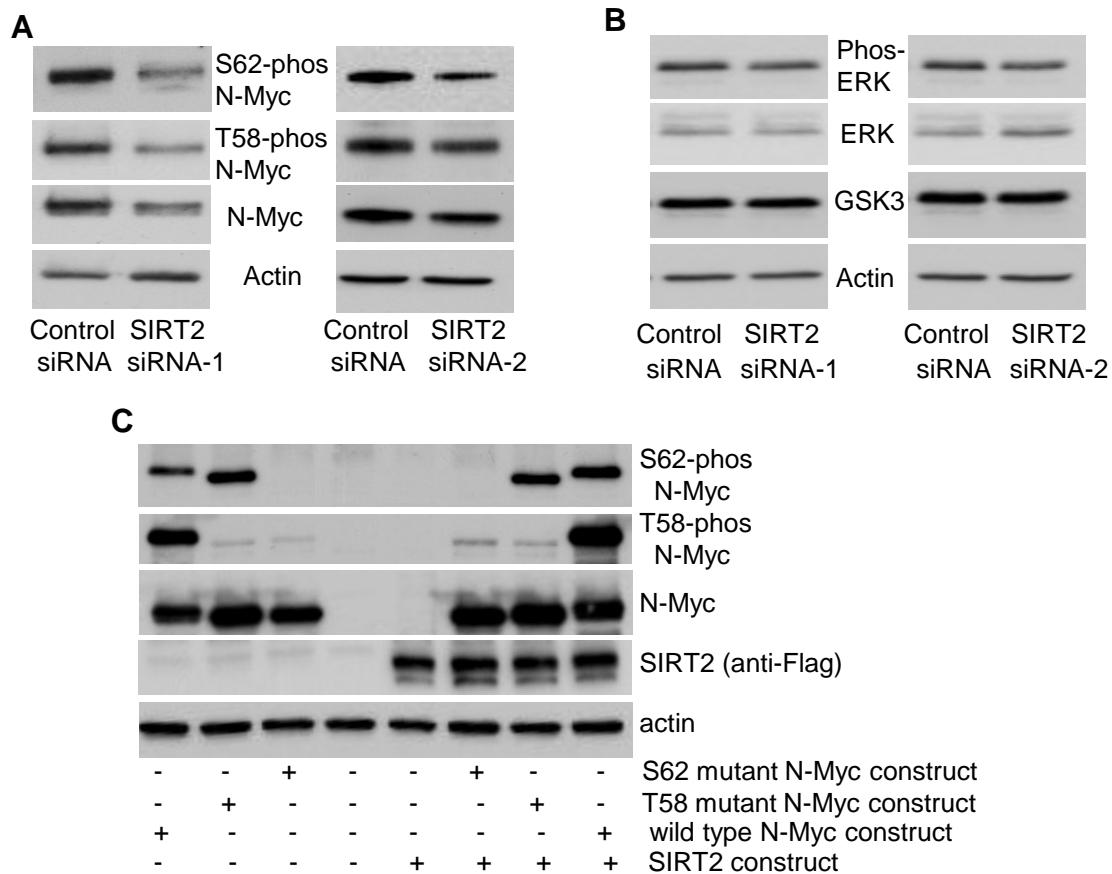

**Figure S3. SIRT2 stabilizes N-Myc protein without modulating ERK protein phosphorylation and GSK3 protein expression.** (A, B) CHP134 neuroblastoma cells were transfected with scrambled control siRNA, SIRT2 siRNA-1 or SIRT2 siRNA-2, followed by protein extraction. The expression of total N-Myc protein, N-Myc protein phosphorylated at S62 (S62-phos) and N-Myc protein phosphorylated at T58 (T58-phos) (A), GSK3 protein, total ERK protein and phosphorylated ERK protein (phos-ERK) (B) was analysed by immunoblot with specific antibodies. (C) Primary HEK293 human embryonic kidney cells were co-transfected with a construct expressing empty vector or Flag-tagged SIRT2, together with a construct expressing empty vector, S62-mutant (S62A) N-Myc or T58-mutant (T58A) N-Myc. The expression of total, S-62-phos and T58-phos N-Myc protein was analysed by immunoblot with specific antibodies, and the expression of SIRT2 was analysed with an anti-Flag antibody.

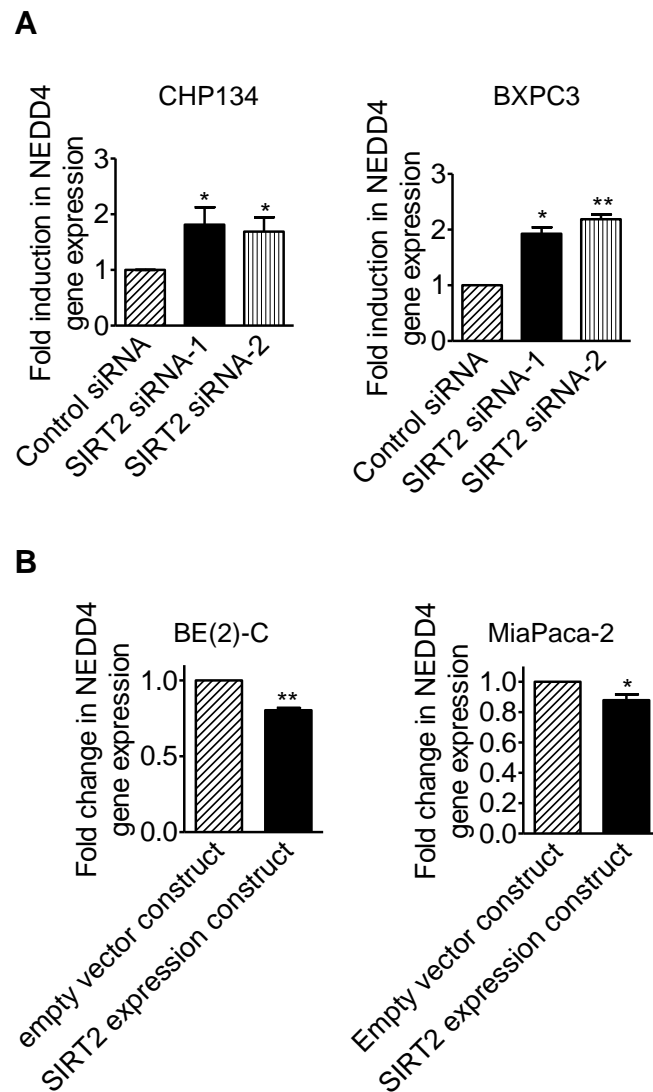

**Figure S4. SIRT2 represses NEDD4 gene expression in neuroblastoma and pancreatic cancer cells.** (A) CHP134 neuroblastoma and BXPC3 pancreatic cancer cells were transfected with scrambled control siRNA, N-Myc siRNA-1, N-Myc siRNA-2, SIRT2 siRNA-1 or SIRT2 siRNA-2 for 48 hours, followed by RNA extraction and real-time RT-PCR analyses of NEDD4 gene expression. (B) BE(2)-C neuroblastoma and MiaPaca-2 pancreatic cancer cells were transfected with a construct expressing empty vector or SIRT2 for 48 hours, followed by RNA extraction and real-time RT-PCR analyses of NEDD4 gene expression. Error bars represented standard error. \* indicated  $P < 0.05$  and \*\*  $P < 0.01$ .

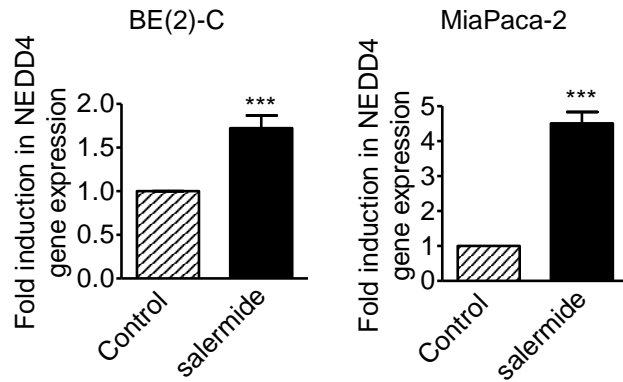

**Figure S5. The SIRT1/SIRT2 inhibitor Salermide induces NEDD4 gene expression in neuroblastoma and pancreatic cancer cells.** BE(2)-C and MiaPaca-2 cells were treated with vehicle control or Salermide at 50 $\mu$ M, at which Salermide inhibited SIRT2 but not SIRT1, for 48 hours, followed by RNA extraction and real-time RT-PCR analysis of NEDD4 gene expression. Error bars represented standard error. \*\*\* indicated  $P < 0.001$ .

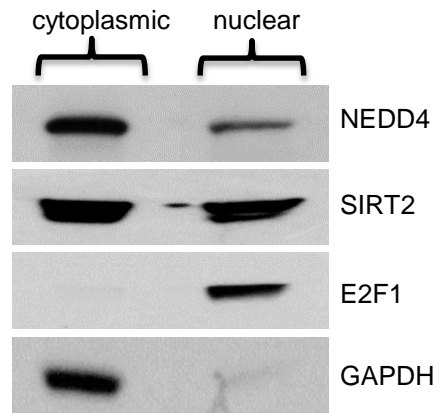

**Figure S6. SIRT2 protein and NEDD4 protein are localized in both cytoplasm and nucleus.**

Cytoplasmic and nuclear protein was extracted from MiaPaca-2 cells, separated and analysed by immunoblot with anti-NEDD4, anti-SIRT2, anti-GAPDH (marker for cytoplasmic protein) and anti-E2F1 (marker for nuclear protein) antibodies.

**Table S1.** Cell cycle analysis of BE(2)-C neuroblastoma cells 72 hours after transfection with control siRNA, SIRT2 siRNA-1 or SIRT2 siRNA-2. Results of cell cycle distribution were expressed as %  $\pm$  standard error.

| Cell cycle distribution | Pre-G1           | G0/G1            | S                | G2/M             |
|-------------------------|------------------|------------------|------------------|------------------|
| Control siRNA           | 7.69 $\pm$ 2.40  | 59.79 $\pm$ 2.45 | 17.16 $\pm$ 0.98 | 15.35 $\pm$ 1.37 |
| SIRT2 siRNA-1           | 10.35 $\pm$ 1.46 | 57.02 $\pm$ 0.72 | 12.31 $\pm$ 0.91 | 20.32 $\pm$ 0.89 |
| SIRT2 siRNA-2           | 21.96 $\pm$ 3.19 | 54.99 $\pm$ 3.08 | 11.81 $\pm$ 0.74 | 11.24 $\pm$ 1.41 |



**Table S2.** Cell cycle analysis of MiaPaca-2 pancreatic cancer cells 72 hours after transfection with control siRNA, SIRT2 siRNA-1 or SIRT2 siRNA-2. Results of cell cycle distribution were expressed as %  $\pm$  standard error.

| Cell cycle distribution | Pre-G1          | G0/G1            | S                | G2/M             |
|-------------------------|-----------------|------------------|------------------|------------------|
| Control siRNA           | 3.42 $\pm$ 1.05 | 38.61 $\pm$ 4.55 | 42.68 $\pm$ 6.13 | 15.27 $\pm$ 4.79 |
| SIRT2 siRNA-1           | 3.76 $\pm$ 0.95 | 42.95 $\pm$ 2.41 | 29.92 $\pm$ 3.83 | 23.38 $\pm$ 1.36 |
| SIRT2 siRNA-2           | 2.42 $\pm$ 0.78 | 53.53 $\pm$ 3.20 | 30.91 $\pm$ 3.52 | 13.16 $\pm$ 4.24 |

## **Legends for Supplementary Table S3 and S4**

**Table S3.** Genes up-regulated by SIRT2 siRNA-1 by more than 2 fold, as identified by Affymetrix gene array analysis, in neuroblastoma BE(2)-C cells 30 hours after transfection with SIRT2 siRNA-1 or control siRNA.

**Table S4.** Genes down-regulated by SIRT2 siRNA-1 by more than 2 fold, as identified by Affymetrix gene array analysis, in neuroblastoma BE(2)-C cells 30 hours after transfection with SIRT2 siRNA-1 or control siRNA.
